# Supplementary material
Source: publisher figshare collection journal article supplement (https://frontiersin.figshare.com/ndownloader/files/28902336)
Supplement: Supplementary file [file 28902336]

## Supplementary Material

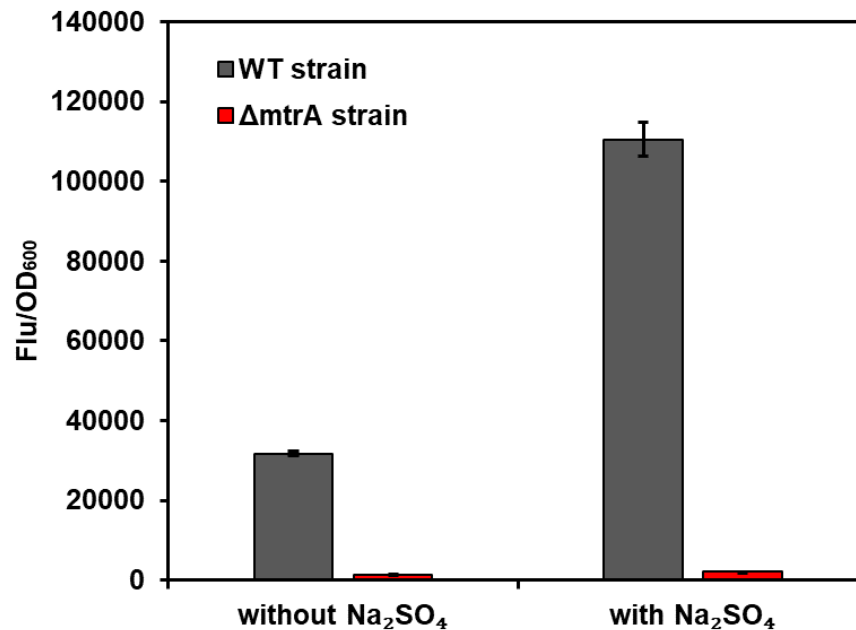

**Figure S1.** The expression of *gfp* gene under the  $P_{NCgl1418}$  in wild-type *C. glutamicum* and *mtrA*-deficient ( $\Delta mtrA$ ) mutant. Cell fluorescence intensity was normalized to cell density and the background value of the strain containing the control vector pXM-con-*gfp* without a promoter was deducted. *C. glutamicum* ATCC 13032 containing the vector pXM- $P_{NCgl1418}$ -*gfp* was used as control (gray bars), and *mtrA*-deficient ( $\Delta mtrA$ ) mutant containing the vector pXM- $P_{NCgl1418}$ -*gfp* was represented by red bars. All data represent mean values from three biological replicates including standard deviations.

|     |                             | -35                 | -10            |                     |                |
|-----|-----------------------------|---------------------|----------------|---------------------|----------------|
| WT  | TATTAAAGATCACACCGAGTGGTGGAA | TTTCCTCAAGTGATTTACC | CACAATGGACTTTG |                     |                |
| A1  | TATTAAAGATCACACCGAGTGGTGGAA | CATTACCTACTTGCCCGAG | CACAATGGACTTTG |                     |                |
| A2  | TATTAAAGATCACACCGAGTGGTGGAA | AACACCCGGCTAACATTGG | CACAATGGACTTTG |                     |                |
| A3  | TATTAAAGATC                 | CGCTTCTTTC          | GTGGAA         | TTTCCTCAAGTGATTTACC | CACAATGGACTTTG |
| A4  | TATTAAAGATC                 | CCAAGTTCCA          | GTGGAA         | TTTCCTCAAGTGATTTACC | CACAATGGACTTTG |
| A5  | TATTAAAGATC                 | CGGTGCCACA          | GTGGAA         | TTTCCTCAAGTGATTTACC | CACAATGGACTTTG |
| A6  | TATTAAAGATC                 | AGGCTTGTCTG         | GTGGAA         | TTTCCTCAAGTGATTTACC | CACAATGGACTTTG |
| A7  | TATTAAAGATC                 | AGCAGTTAGG          | GTGGAA         | TTTCCTCAAGTGATTTACC | CACAATGGACTTTG |
| A8  | TATTAAAGATC                 | TATCTAGAGG          | GTGGAA         | TTTCCTCAAGTGATTTACC | CACAATGGACTTTG |
| A9  | TATTAAAGATC                 | GCACGAAAGG          | GTGGAA         | TTTCCTCAAGTGATTTACC | CACAATGGACTTTG |
| A10 | TATTAAAGATC                 | TAACTCTTGG          | GTGGAA         | TTTCCTCAAGTGATTTACC | CACAATGGACTTTG |

**Figure S2.** Sequence analysis of the isolated promoters. The boxes indicate the –10 and –35 regions of promoters. The WT promoter is  $P_{NCgl1418}$ .

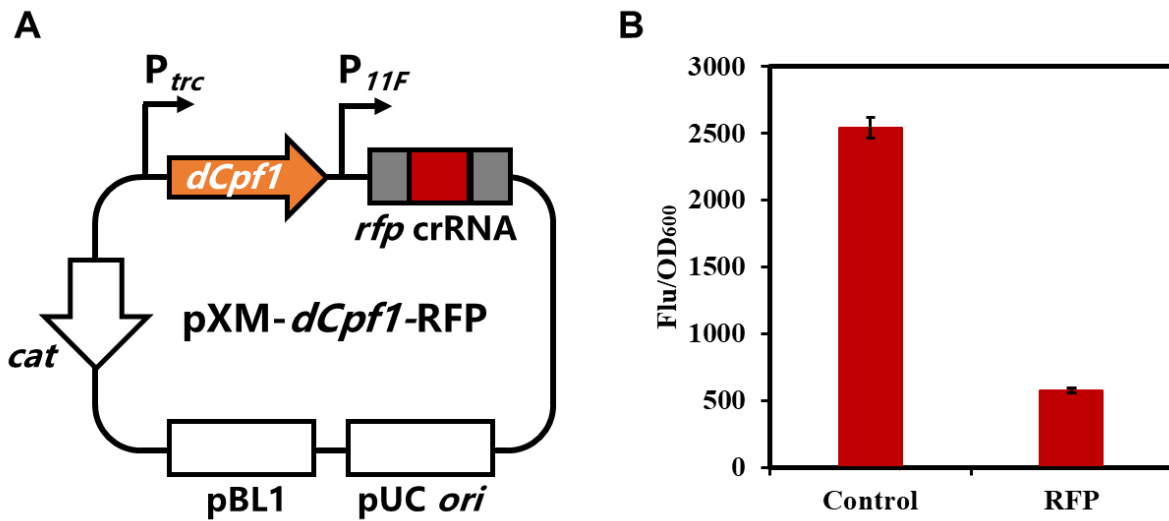

**Figure S3.** Development of an all-in-one plasmid for CRISPR-dCpf1-mediated gene repression in *C. glutamicum*. **(A)** Schematic diagram of the tool plasmid for *rfp* repression. **(B)** Fluorescence intensities of RFP controlled by the CRISPR-dCpf1 system with *rfp*-targeting crRNA. The strain expressing dCpf1 but no crRNA was used as the control. IPTG (1 mM) was used for inducing dCpf1 expression. Cell fluorescence intensity was normalized to cell density. All data represent mean values from three biological replicates including standard deviations.

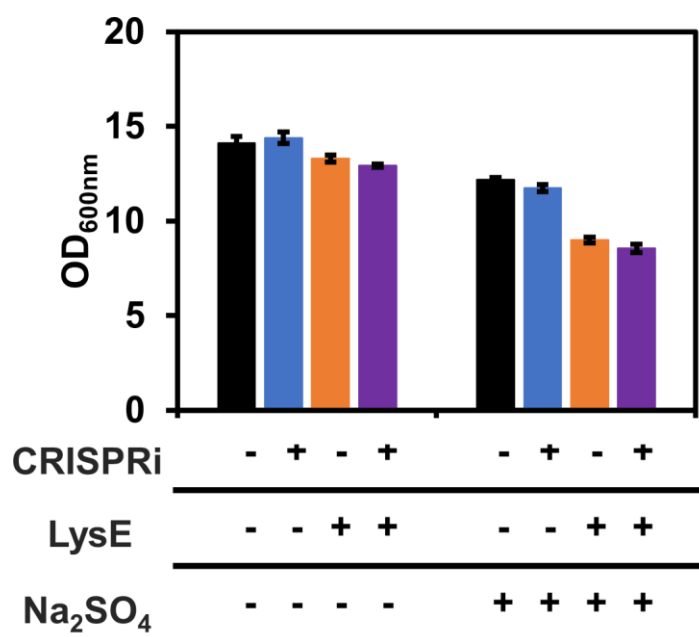

**Figure S4.** Effects of  $P_{NCgl1418-A10}$  promoter-regulated *lysE* overexpression and/or multiple genes (*gltA*, *pgi*, *hom*, and *pck*) repression on cell densities. SCgL30 strains expressing LysE and/or dCpf1 with a crRNA array were cultivated in fermentation medium for 36 h. SCgL30 strains containing the empty vector pEC-XK99E and/or the plasmid pXM- $P_{NCgl1418}$ -con without the crRNA array were used as controls. All data represent mean values from three biological replicates including standard deviations.

**Table S1** Bacterial strains and plasmids used in this study

| Strain or plasmid               | Relevant characteristic <sup>a</sup>                                                                                              | Source             |
|---------------------------------|-----------------------------------------------------------------------------------------------------------------------------------|--------------------|
| <b>Strain</b>                   |                                                                                                                                   |                    |
| <i>E. coli</i>                  |                                                                                                                                   |                    |
| Trans1-T1                       | Host for cloning                                                                                                                  | TransGen Biotech   |
| Trans DB 3.1                    | Host for cloning of plasmid harboring <i>ccdB</i> gene                                                                            | TransGen Biotech   |
| <i>C. glutamicum</i>            |                                                                                                                                   |                    |
| ATCC 13032                      | Wild-type strain                                                                                                                  | ATCC               |
| ATCC 13032:: <i>rfp</i>         | ATCC 13032 derivative with chromosomal insertion of a <i>rfp</i> expression cassette                                              | (Liu et al., 2017) |
| SCgL30                          | ATCC 13032 derivative with LysC <sup>T311I</sup>                                                                                  | Lab stock          |
| ATCC 13032 $\Delta$ <i>mtrA</i> | ATCC 13032 derivative with <i>mtrA</i> deleted                                                                                    | This study         |
| SGcon                           | ATCC 13032 derivative harboring plasmid pXM-con- <i>gfp</i>                                                                       | This study         |
| SGabgT                          | ATCC 13032 derivative harboring plasmid pXM-P <sub>abgT</sub> - <i>gfp</i>                                                        | This study         |
| SGcsbD                          | ATCC 13032 derivative harboring plasmid pXM-P <sub>csbD</sub> - <i>gfp</i>                                                        | This study         |
| SGbetP                          | ATCC 13032 derivative harboring plasmid pXM-P <sub>betP</sub> - <i>gfp</i>                                                        | This study         |
| SG1418                          | ATCC 13032 derivative harboring plasmid pXM-P <sub>NCgl1418</sub> - <i>gfp</i>                                                    | This study         |
| SG1756                          | ATCC 13032 derivative harboring plasmid pXM-P <sub>NCgl1756</sub> - <i>gfp</i>                                                    | This study         |
| SG1838                          | ATCC 13032 derivative harboring plasmid pXM-P <sub>NCgl1838</sub> - <i>gfp</i>                                                    | This study         |
| SG2841                          | ATCC 13032 derivative harboring plasmid pXM-P <sub>NCgl2841</sub> - <i>gfp</i>                                                    | This study         |
| SGproP                          | ATCC 13032 derivative harboring plasmid pXM-P <sub>proP</sub> - <i>gfp</i>                                                        | This study         |
| SGtac                           | ATCC 13032 derivative harboring plasmid pXM-P <sub>tac</sub> - <i>gfp</i>                                                         | This study         |
| SGtuf                           | ATCC 13032 derivative harboring plasmid pXM-P <sub>tuf</sub> - <i>gfp</i>                                                         | This study         |
| SG203                           | ATCC 13032 derivative harboring plasmid pXM-P <sub>NCgl1418-203</sub> - <i>gfp</i>                                                | This study         |
| SG145                           | ATCC 13032 derivative harboring plasmid pXM-P <sub>NCgl1418-145</sub> - <i>gfp</i>                                                | This study         |
| SG94                            | ATCC 13032 derivative harboring plasmid pXM-P <sub>NCgl1418-94</sub> - <i>gfp</i>                                                 | This study         |
| SMcon                           | ATCC 13032 $\Delta$ <i>mtrA</i> derivative harboring plasmid pXM-con- <i>gfp</i>                                                  | This study         |
| SM1418                          | ATCC 13032 $\Delta$ <i>mtrA</i> derivative harboring plasmid pXM-P <sub>NCgl1418</sub> - <i>gfp</i>                               | This study         |
| SRcon                           | ATCC 13032:: <i>rfp</i> derivative harboring plasmid pXM-07                                                                       | This study         |
| SRRFP                           | ATCC 13032:: <i>rfp</i> derivative harboring plasmid pXM- <i>dCpfI</i> -RFP                                                       | This study         |
| SLDEcon1                        | SCgL30 derivative harboring plasmids pXM-P <sub>NCgl1418</sub> -con and pEC-XK99E                                                 | This study         |
| SLD1418                         | SCgL30 derivative harboring plasmids pXM-P <sub>NCgl1418</sub> - <i>dCpfI</i> -4crRNA and pEC-XK99E                               | This study         |
| SLE1418                         | SCgL30 derivative harboring plasmids pEC-P <sub>NCgl1418</sub> - <i>lysE</i> and pXM-P <sub>NCgl1418</sub> -con                   | This study         |
| SLDE1418                        | SCgL30 derivative harboring plasmids pXM-P <sub>NCgl1418</sub> - <i>dCpfI</i> -4crRNA and pEC-P <sub>NCgl1418</sub> - <i>lysE</i> | This study         |

|                                    |                                                                                                                           |                            |
|------------------------------------|---------------------------------------------------------------------------------------------------------------------------|----------------------------|
| SLDEcon2                           | SCgL30 derivative harboring plasmids pXM-P <sub>NCgl1418-A10-con</sub> and pEC-XK99E                                      | This study                 |
| SLDA10                             | SCgL30 derivative harboring plasmids pXM-P <sub>NCgl1418-A10-dCpfI-4crRNA</sub> and pEC-XK99E                             | This study                 |
| SLEA10                             | SCgL30 derivative harboring plasmids pEC-P <sub>NCgl1418-A10-lysE</sub> and pXM-A10-con                                   | This study                 |
| SLDEA10                            | SCgL30 derivative harboring plasmids pXM-P <sub>NCgl1418-A10-dCpfI-4crRNA</sub> and pEC-P <sub>NCgl1418-A10-lysE</sub>    | This study                 |
| <b>Plasmid</b>                     |                                                                                                                           |                            |
| pXMJ19                             | Expression vector of <i>E. coli</i> and <i>C. glutamicum</i> , IPTG-inducible promoter P <sub>tac</sub> , Cm <sup>R</sup> | (Jakoby et al., 1999)      |
| pEC-XK99E                          | Expression vector of <i>E. coli</i> and <i>C. glutamicum</i> , IPTG-inducible promoter P <sub>trc</sub> , Km <sup>R</sup> | (Kirchner and Tauch, 2003) |
| pXM-gfp                            | pXMJ19 derivative carrying <i>gfp</i> gene                                                                                | (Sun et al., 2019)         |
| pEC-02                             | pEC-XK99E derivative, carrying the crRNA cassette with <i>ccdB</i> gene                                                   | (Li et al., 2020)          |
| pXM-07                             | pXMJ19 derivative, carrying dCpfI (E1006A, D917A) encoding gene                                                           | (Li et al., 2020)          |
| pCas9                              | pXMJ19 derivative, carrying <i>cas9</i> gene, driven by IPTG-inducible promoter P <sub>tac</sub>                          | (Liu et al., 2017)         |
| pgRNA2                             | pEC-XK99E derivative carrying gRNA targeting <i>ldhA</i> , driven by constitutive promoter P <sub>11F</sub>               | (Liu et al., 2017)         |
| pXM-con-gfp                        | pXM-gfp derivative with deletion of P <sub>tac</sub>                                                                      | This study                 |
| pXM-P <sub>abgT</sub> -gfp         | pXM-gfp derivative, P <sub>tac</sub> replaced with P <sub>abgT</sub>                                                      | This study                 |
| pXM-P <sub>csbD</sub> -gfp         | pXM-gfp derivative, P <sub>tac</sub> replaced with P <sub>csbD</sub>                                                      | This study                 |
| pXM-P <sub>betP</sub> -gfp         | pXM-gfp derivative, P <sub>tac</sub> replaced with P <sub>betP</sub>                                                      | This study                 |
| pXM-P <sub>NCgl1418</sub> -gfp     | pXM-gfp derivative, P <sub>tac</sub> replaced with P <sub>NCgl1418</sub>                                                  | This study                 |
| pXM-P <sub>NCgl1756</sub> -gfp     | pXM-gfp derivative, P <sub>tac</sub> replaced with P <sub>NCgl1756</sub>                                                  | This study                 |
| pXM-P <sub>NCgl1838</sub> -gfp     | pXM-gfp derivative, P <sub>tac</sub> replaced with P <sub>NCgl1838</sub>                                                  | This study                 |
| pXM-P <sub>NCgl2841</sub> -gfp     | pXM-gfp derivative, P <sub>tac</sub> replaced with P <sub>NCgl2841</sub>                                                  | This study                 |
| pXM-P <sub>proP</sub> -gfp         | pXM-gfp derivative, P <sub>tac</sub> replaced with P <sub>proP</sub>                                                      | This study                 |
| pXM-P <sub>tuf</sub> -gfp          | pXM-gfp derivative, P <sub>tac</sub> replaced with P <sub>tuf</sub>                                                       | This study                 |
| pXM-P <sub>tac</sub> -gfp          | pXM-gfp derivative, the original RBS replaced with the RBS of P <sub>NCgl1418</sub>                                       | This study                 |
| pXM-P <sub>NCgl1418-203-gfp</sub>  | pXM-P <sub>NCgl1418-gfp</sub> derivative, P <sub>NCgl1418</sub> replaced with P <sub>NCgl1418-203</sub>                   | This study                 |
| pXM-P <sub>NCgl1418-145-gfp</sub>  | pXM-P <sub>NCgl1418-gfp</sub> derivative, P <sub>NCgl1418</sub> replaced with P <sub>NCgl1418-145</sub>                   | This study                 |
| pXM-P <sub>NCgl1418-94-gfp</sub>   | pXM-P <sub>NCgl1418-gfp</sub> derivative, P <sub>NCgl1418</sub> replaced with P <sub>NCgl1418-94</sub>                    | This study                 |
| pEC-P <sub>NCgl1418-lysE</sub>     | pEC-XK99E derivative, carrying <i>lysE</i> gene, P <sub>trc</sub> replaced with P <sub>NCgl1418</sub>                     | This study                 |
| pEC-P <sub>NCgl1418-A10-lysE</sub> | pEC-P <sub>NCgl1418-lysE</sub> derivative, P <sub>NCgl1418</sub> replaced with P <sub>NCgl1418-A10</sub>                  | This study                 |

|                                                      |                                                                                                                               |            |
|------------------------------------------------------|-------------------------------------------------------------------------------------------------------------------------------|------------|
| pXM- <i>dCpfI</i>                                    | pXM-07 derivative, carrying the crRNA cassette with <i>ccdB</i> gene                                                          | This study |
| pXM- <i>dCpfI</i> -RFP                               | pXM- <i>dCpfI</i> derivative, carrying the <i>rfp</i> crRNA                                                                   | This study |
| pXM- <i>dCpfI</i> -4crRNA                            | pXM- <i>dCpfI</i> derivative, carrying the crRNA array targeting <i>gltA</i> , <i>pgi</i> , <i>hom</i> , and <i>pck</i> genes | This study |
| pXM-P <sub>NCgl1418</sub> -con                       | pXM-07 derivative, P <sub>tac</sub> replaced with P <sub>NCgl1418</sub>                                                       | This study |
| pXM-P <sub>NCgl1418</sub> - <i>dCpfI</i> -4crRNA     | pXM- <i>dCpfI</i> -4crRNA derivative, P <sub>tac</sub> replaced with P <sub>NCgl1418</sub>                                    | This study |
| pXM-P <sub>NCgl1418-A10</sub> -con                   | pXM-P <sub>NCgl1418</sub> -con derivative, P <sub>NCgl1418</sub> replaced with P <sub>NCgl1418-A10</sub>                      | This study |
| pXM-P <sub>NCgl1418-A10</sub> - <i>dCpfI</i> -4crRNA | pXM-P <sub>NCgl1418</sub> - <i>dCpfI</i> derivative, P <sub>NCgl1418</sub> replaced with P <sub>NCgl1418-A10</sub>            | This study |
| pgRNA-Δ <i>mtrA</i>                                  | pgRNA2 derivative, for knock-out of <i>mtrA</i>                                                                               | This study |

---

<sup>a</sup>Km<sup>R</sup> and Cm<sup>R</sup> represent resistance to kanamycin and chloramphenicol, respectively.

**Table S2** Primers used in this study

| Primer     | Sequence (5'-3')                                  | Relevance                                  |
|------------|---------------------------------------------------|--------------------------------------------|
| pGFP-F     | ATGAGTAAAGGAGAAGAACTTTTCAC                        | pXM-con-gfp                                |
| pGFP-R     | CCCGTCTCACTGGTGAAAAG                              | construction                               |
| abgT-F     | TTCACCAGTGAGACGGGCGTGTCCAAGGTAGAGCA<br>GTTG       | pXM-P <sub>abgT</sub> -gfp<br>construction |
| abgT-R     | TCTTCTCCTTTACTCATTCTCAGACCTTTGCAGTCA<br>TG        |                                            |
| csbD-F     | TTCACCAGTGAGACGGGATCGTATTCGGAGCATTTG<br>AGC       | pXM-P <sub>csbD</sub> -gfp<br>construction |
| csbD-R     | TCTTCTCCTTTACTCATGTGGTGCTCATCTCCTACTT<br>CTAG     |                                            |
| betP-F     | TTCACCAGTGAGACGGGAGCGGTTGAAAGCGGTGT<br>GC         | pXM-P <sub>betP</sub> -gfp<br>construction |
| betP-R     | TCTTCTCCTTTACTCATTATCGGTTTCGGATTTGGGT<br>CAG      |                                            |
| 1418-F     | TTCACCAGTGAGACGGGTAAAACTCGCGATGAAGT<br>AG         | pXM-P <sub>NCgl1418</sub> -<br>gfp         |
| 1418-R     | TCTTCTCCTTTACTCATCATTGGCCTTTCTCGAATTG<br>GG       | construction                               |
| 1756-F     | TTCACCAGTGAGACGGGAGGGTTGCTAACGGTAAA<br>GAATG      | pXM-P <sub>NCgl1756</sub> -<br>gfp         |
| 1756-R     | TCTTCTCCTTTACTCATCGGGATTCCTTTCTGTTTTG<br>C        | construction                               |
| 1838-F     | TTCACCAGTGAGACGGGCGTCTGCGCAAAGAACTC<br>AAC        | pXM-P <sub>NCgl1838</sub> -<br>gfp         |
| 1838-R     | TCTTCTCCTTTACTCATCAGCTGGCCTTTCCATCGAC             | construction                               |
| 2841-F     | TTCACCAGTGAGACGGGATTGGTGTTTGCGGGTTAG<br>TTC       | pXM-P <sub>NCgl2841</sub> -<br>gfp         |
| 2841-R     | TCTTCTCCTTTACTCATGTGGTTCTCCTTTTCTTTTCG<br>GTG     | construction                               |
| proP-F     | TTCACCAGTGAGACGGGGCACCGAAAACAGTAACT<br>TTCC       | pXM-P <sub>proP</sub> -gfp<br>construction |
| proP-R     | TCTTCTCCTTTACTCATGAGTAAACCTCTCGTCAT<br>ATCTTATGAG |                                            |
| tuf-F      | CACCAGTGAGACGGGAGATCGTTTAGATCCGAAGG<br>AAAA       | pXM-<br>P <sub>tuf+1418RBS</sub> -gfp      |
| tuf-R      | CTCGAATTGGGTATCAACGGACTTCGTGGTGGCTAC<br>GA        | construction                               |
| pGFP-tuf-F | GTTGATACCCAATTTCGAGAAAGG                          |                                            |
| tac-F      | CGAGAAAGGCCAATGATGAGTAAAGGAGAAGAAC<br>TTTTCACTG   | pXM-<br>P <sub>tac+1418RBS</sub> -gfp      |
| tac-R      | AATTGGGTATCAACAAGCTTAATTAATTCTGTTTCC<br>TGTGTG    | construction                               |



|            |                                                                           |                                                         |
|------------|---------------------------------------------------------------------------|---------------------------------------------------------|
| 1418-203-F | GACACCTGTGAGTTTCAAACCTCC                                                  | pXM-P <sub>NCgl1418-</sub><br>206bp-gfp<br>construction |
| 1418-145-F | TTTGTTTATGCAGGTGGCG                                                       | pXM-P <sub>NCgl1418-</sub><br>148bp-gfp<br>construction |
| 1418-94-F  | GTTTCTATGTATTAAAGATCACACCG                                                | pXM-P <sub>NCgl1418-</sub><br>97bp-gfp<br>construction  |
| pEC-F      | TTTCACACAGGAAACAGACCATG                                                   | pEC-P <sub>NCgl1418-</sub>                              |
| pEC-R      | AACGTAAATGCATGCCGCTTC                                                     | lysE                                                    |
| lysE-F     | ATGGTGATCATGGAAATCTTCATTAC                                                | construction                                            |
| lysE-R     | GTCTGTTTCCTGTGTGAAACTAACCCATCAACATCA<br>GTTTGATG                          |                                                         |
| 1418-E-F   | AGCGGCATGCATTTACGTTTAAAACTCGCGATGAA<br>GTAG                               |                                                         |
| 1418-E-R   | AGATTTCCATGATCACCATCATTGGCCTTTCTCGAA<br>TTGGG                             |                                                         |
| A10-E-F    | TAACCTCTGGGTGGAATTTCTCAAGTGATTTAC                                         | pEC-P <sub>A10-lysE</sub>                               |
| A10-E-R    | GATCTTTAATACATAGAAACAGATCTGTTACC                                          | construction                                            |
| pXM-07-F1  | GAATATAAGGTCTCAGACACCAGAAGACAAGAATT<br>TCTACTGTTGTAGATCCAGGCATCAAATAAAACG | pXM-dCpfI<br>construction                               |
| pXM-07-R1  | ACCGAAGATAGCTCATGTTATATCCCGCCGTTA                                         |                                                         |
| pXM-07-F2  | CATGAGCTATCTTCGGTATCGTCGTATCCCA                                           |                                                         |
| pXM-07-R2  | CATGAAGATGGTACGCGACTGGGCGTGGA                                             |                                                         |
| pXM-07-F3  | TCGCGTACCATCTTCATGGGAGAAAATAATAC                                          |                                                         |
| pXM-07-R3  | TGAATTACACTGTACCTGTTGCG                                                   |                                                         |
| ccdB-F     | GTACAGTGTAATTCAGAATTTCTACTGTTGTAGATT<br>TGTCTTCTGGTGTCTGAGACCACGCGTGGATCC |                                                         |
| ccdB-R     | TGAGACCTTATATTCCCCAGAACATCAG                                              |                                                         |
| RFP-F      | AGATAAAGTTCGTATGGAAGGTTCCGTT                                              | pXM-dCpfI-<br>RFP                                       |
| RFP-R      | ATTCAACGGAACCTTCCATACGAACCTT                                              | construction                                            |
| array-F1   | AGATAAAGGGATATCGTGGCTACTGATGAATTTCT<br>ACT                                | pXM-dCpfI-<br>4crRNA                                    |
| array-R1   | CAACAGTAGAAATTCATCAGTAGCCACGATATCCC<br>TTT                                | construction                                            |
| array-F2   | GTTGTAGATGCAAGACCTGACCGATCATTACTGAAT<br>TTC                               |                                                         |
| array-R2   | AGTAGAAATTCAGTAATGATCGGTCAGGTCTTGCAT<br>CTA                               |                                                         |
| array-F3   | TACTGTTGTAGATACCCCGGCAAGGGTCCCGGCTCA<br>GAATTTCT                          |                                                         |
| array-R3   | CAGTAGAAATTTCTGAGCCGGGACCCTTGCCGGGGT<br>ATCTACAAC                         |                                                         |
| array-F4   | ACTGTTGTAGATTGTTTCGTTGATGGATCCCAGGCT                                      |                                                         |
| array-R4   | ATTCAGCCTGGGATCCATCAACGAACAATCTACAA                                       |                                                         |
| pXM-D-F1   | GTGTCAATTTATCAAGAATTTGTTAATAAA                                            |                                                         |

|                 |                                                         |                                                                                             |
|-----------------|---------------------------------------------------------|---------------------------------------------------------------------------------------------|
| pXM-D-R1        | AACCGTATTACCGCCTTTGAG                                   | pXM-P <sub>NCgl1418</sub> -<br>con and pXM-<br>P <sub>NCgl1418</sub> -dCpf1<br>construction |
| pXM-D-F2        | CAAAGGCGGTAATACGGTTATC                                  |                                                                                             |
| pXM-D-R2        | CCCGTCTCACTGGTGAAAAG                                    |                                                                                             |
| 1418-D-F        | CTTTTCACCAGTGAGACGGGTAAAACTCGCGATGA<br>AGTAG            |                                                                                             |
| 1418-D-R        | TTCTTGATAAATTGACACCATTGGCCTTTCTCGAAT<br>TGGG            | pXM-P <sub>A10</sub> -con<br>and pXM-P <sub>A10</sub> -<br>dCpf1<br>construction            |
| A10-D-F1        | TAACTCTTGGGTGGAATTTCTCAAGTGATTTAC                       |                                                                                             |
| A10-D-R1        | AACCGTATTACCGCCTTTGAG                                   |                                                                                             |
| A10-D-F2        | CAAAGGCGGTAATACGGTTATC                                  |                                                                                             |
| A10-D-R2        | AAATTCCACCCAAGAGTTAGATCTTTAATACATAGA<br>AACAGATCTGTTACC | pgRNA-ΔmtrA<br>construction                                                                 |
| gRNA-mtrA       | GTGGTGCTCGGTTTGGAATCGTTTTAGAGCTAGAAA<br>TAGCAAG         |                                                                                             |
| pgRNA-1         | CGCTTCCTTTAGCAGCCCTTG                                   |                                                                                             |
| pgRNA-2         | GTAGAAAGCCAGTCCGCAGAAACG                                |                                                                                             |
| pgRNA-3         | GATTCCAAACCGAGCACCCTGAATTACACTGTAC<br>CTGTTGCGTC        | promoter<br>library<br>construction                                                         |
| mtrA-del-up-F   | GGGCTGCTAAAGGAAGCGACCCATCATTTGTCATG<br>TCCAAC           |                                                                                             |
| mtrA-del-up-R   | GTCGGTGACAGCTACGGTGT                                    |                                                                                             |
| mtrA-del-down-F | ACCGTAGCTGTCACCGACACACTCGACTGGTCAAC<br>GTTC             |                                                                                             |
| mtrA-del-down-R | TGCGGACTGGCTTTCTACCGTGTGAGACATCCGATG<br>TG              | promoter<br>library<br>construction                                                         |
| P-Library-F1    | NNNNNNNNNNNNNNNNNNNNNCACAATGGACTTTGTT<br>GATACCC        |                                                                                             |
| P-Library-R1    | TTCCACCACTCGGTGTGATC                                    |                                                                                             |
| P-Library-F2    | NNNNNNNNNNNGTGGAATTTCTCAAGTGATTTACC                     |                                                                                             |
| P-Library-R2    | GATCTTTAATACATAGAAACAGATCTGTTACCC                       |                                                                                             |

**Table S3** crRNAs and gene expression elements used in this study

| Gene element                     | Sequence (5'-3')                                                                                                                                                                                                                                                                                    |
|----------------------------------|-----------------------------------------------------------------------------------------------------------------------------------------------------------------------------------------------------------------------------------------------------------------------------------------------------|
| <b>crRNA</b>                     |                                                                                                                                                                                                                                                                                                     |
| <i>rfp</i>                       | GAATTTCTACTGTTGTAGATaaagttcgtatggaaggtccggtGAATTTCTACTGTTGTAGAT                                                                                                                                                                                                                                     |
| crRNA array targeting four genes | GAATTTCTACTGTTGTAGATaaaggatatcgtggctactgatGAATTTCTACTGTTGTAGATgcaagacctgaccgatcattactGAATTTCTACTGTTGTAGATacccggcaagggtcccggctcaGAATTTCTACTGTTGTAGATgtttcggtgatggatccaggctGAATTTCTACTGTTGTAGAT                                                                                                       |
| <b>Promoter</b>                  |                                                                                                                                                                                                                                                                                                     |
| $P_{tac}$                        | TGACAATTAATCATCGGCTCGTATAATGTGTGGAATTGTGAGCGGATAACAATTTACACAGGAAACAGAATTAATTAAGCTTAAGAAGGAGATA TACAT                                                                                                                                                                                                |
| $P_{trc}$                        | TTGACAATTAATCATCGGCTCGTATAATGTGTGGAATTGTGAGCGGATAACAATTTT                                                                                                                                                                                                                                           |
| $P_{11F}$                        | TTTTCTCCACATAAGCTGGCAATGTTGCGACGCAACAGGTACAGTGTAATTCA                                                                                                                                                                                                                                               |
| $P_{abgT}$                       | CGTGTCCAAGGTAGAGCAGTTGAAGGATTTGATGGCTGTGAAGGATGTGGAGCTGAGCGCTGAGCAGTTGCACGTTTGGATAAAGTTTCGGAGCCTTTCGCTTAAGCTCTCCTCAAAAGTAAGTGATGCAAGTCATAACATTTGCATTACGGTTGCCTTATTTACCGATATTTATTCGGTGAGTTACTTAGTCTGGCTGGCATCGCCGGAACCGGACCGAGGTTTTCCGCATGACTGCAAAAGGTCTGAGAA                                        |
| $P_{csbD}$                       | ATCGTATTCGGAGCATTTGAGCCCCGAACCGGCGCCTGTGGATCTGTA TTTGACGTGGTTTCGAGACCCCGCGGTGTTGCACAAAGTGGAAGTCAGTGGAGGAATCCTCGAGCCTGAATGTGCTGCCTTGATGACCGAATTTTTCGAACTTCACAGGTAACGGATTTATATCAATTTACAGGGCGTGGCGAGCTTTTAGTGATTACGCTCCTACGGTGGGTATCACAAATACCTCACTAGAAGTAGGAGATGAGCACCAC                               |
| $P_{betP}$                       | AGCGGTTGAAAGCGGTGTGCGCAGACCTCGCGAAAATCCATGGCGTGAGCAAAAATGAACTCTACGATGCGGTTATTTCTGCCAGGGAAAATTAA TCGTTATGTCAATTGTGATGCTCCCGTGAACATAAACGGGACTTACTGGCTTTACTTAAGTAACAGCTATGTAAAAGACCAGGTCAGGTTTCGGGTCTGTTTAGGTACGAAACCCATTTTTTCGGTTTGCTTTCCAGGTTTCCCCAAGTAAAGGTGAGTTTTATGACTACATCTGACCCAAATCCGAAACCGATA |
| $P_{NCgl1418}$                   | TAAAACTCGCGATGAAGTAGAAAAACAACGCAACACTTAAGACACCTGTGAGTTTCAAACCTCCCCATTATCGCCTTAGTCAGGCGGTAGTGGGGA GTTTTTGTTTATGCAGGTGGCGCGATTCTTAGATTTTCATAAGGGTAACAGATCTGTTTCTATGTATTAAAGATCACACCGAGTGGTGGAATTTCTCAAGTGATTTACCCACAATGGACTTTGTTGATACCCAATTCGAGAAAGGC CAATG                                           |

---

|                                 |                                                                                                                                                                                                                                                                                                                                                                                                                                                                                                                                                                                           |
|---------------------------------|-------------------------------------------------------------------------------------------------------------------------------------------------------------------------------------------------------------------------------------------------------------------------------------------------------------------------------------------------------------------------------------------------------------------------------------------------------------------------------------------------------------------------------------------------------------------------------------------|
| <i>P<sub>NCgl1756</sub></i>     | AGGGTTGCTAACGGTAAAGAATGAGAGTTTCGCCACTCTAAAATCGCG<br>GTGAGCAGGGCGGTTGCGATGACTAAAACCACGAAAGCAAGAAGGAA<br>AACTGAATACATTTCCGGAAGGGGGATATTGTTTGACGTATTGATTTT<br>GTTAGCGACATTCACCTGTGGTTTACTCCCCTGCTTTTCGACAATGTAG<br>TGGTCATACGTTTCGATCATTTGTAACATTCTTATTACAAGACTGGAAA<br>TAAAGGTGAGTCAATCATAACAGTCAGATGTGGTCATCGGCAAAACAG<br>AAAGGAATCCCG                                                                                                                                                                                                                                                     |
| <i>P<sub>NCgl1838</sub></i>     | CGTCTGCGCAAAGAACTCAACACCATCGTGTCTATCACCTCTGGACGC<br>ACCGGCCGCCACACGGCGCAATCCACACCGAAGCACGTAAACACTG<br>CGGTGGCCACCAACGGCACTTTGTAGCGCCGAACAACCTCCGGGCACG<br>CATTGACTACCTGCGAAAGTGGTAACACATAACATTTTTGTTGCAATA<br>TCCATACCCTCAACATCTGCTCAAGGTGTTGAGGGTATCCTTGTCTGGG<br>CATAAAAATACATAGCTTTGTGCAGCATTTATTGAACCACGTCGATGG<br>AAAGGCCAGCTG                                                                                                                                                                                                                                                       |
| <i>P<sub>NCgl2841</sub></i>     | ATTGGTGTTTGCGGGTTAGTTCGGGGCCATTCGAAAGGGAGAAACCAAG<br>GGCAGCCAGACAGACGTGCCAAGAATCTGGATTTCCGCCAGGTTTTGG<br>CACGCCCCGTCTGGTTTAGGCAATGAGATACCGAACACACGTGCCAAAA<br>GTTTCGGCTTTTTCGCCGATCTTGTACGCCTGCCTGGTTTGTCTTGTA<br>AGAGTGATTTTCATGGCCGAGACTCCTAAAAGTTTGACCTCACAGGATT<br>GCTTCTAAGGGCCTCTCCAATCTCCACTGAGGTACTTAATCCTTCCGGG<br>GAATTCGGGCGCTTAAATCGAGAAATTAGGCCATCACCTTTTAATAAC<br>AATACAATGAATAATTGGAATAGGTCGACACCTTTGGAGCGGAGCCG<br>GTTAAAATTGGCAGCATTCACCGAAAGAAAAGGAGAACCAC                                                                                                              |
| <i>P<sub>proP</sub></i>         | GCACCGAAAACAGTAACTTTCCCAAGAAAAATATAAGAAAACCTTCCC<br>CACACAGGCCGTGAAGAGCCTGAATTTATTGATTTTTTCAGACAGATCT<br>GGAAATGTGACCAATTTGTAACCCACCCCGCTCACCTGCATGAGTGT<br>GGGGTCTTTTTGCATTCTTCCAGCTCCCAGACTTGAAAACGATCTGACT<br>TTTCACCCCGAACCTTACTAAGGTCGATTCATGTTGAAAAGAGAGGTG<br>GTGTTTTCACTTCCCTTTTATAGGCAAAGCTTTAAGGAGTCTTACAGGA<br>AGAAGTTAACACCGCCCAGGGGTGCGTTGGATGATGATCATCTACAAA<br>CAAACATTCCGTTATGCACTCATAAGATATGACGAGAGGTTTTACTC<br>AGATCGTTTAGATCCGAAGGAAAACGTCGAAAAGCAATTTGCTTTTCG<br>ACGCCCCACCCCGCGCGTTTTAGCGTGTGAGTAGGCGCGTAGGGTAAG<br>TGGGGTAGCGGCTTGTTAGATATCTTGAAATCGGCTTTCAACAGCATT |
| <i>P<sub>uuf</sub></i>          | GATTTTCGATGTATTTAGCTGGCCGTTACCCTGCGAATGTCCACAGGGT<br>AGCTGGTAGTTTGAAAATCAACGCCGTTGCCCTTAGGATTCAGTAACT<br>GGCACATTTTGTAATGCGCTAGATCTGTGTGCTCAGTCTTCCAGGCTGC<br>TTATCACAGTGAAAGCAAAACCAATTCGTGGCTGCGAAAGTCGTAGCC<br>ACCACGAAGTCCGTTGATACCCAATTCGAGAAAGGCCAATG                                                                                                                                                                                                                                                                                                                               |
| <i>P<sub>tac</sub></i>          | TGACAATTAATCATCGGCTCGTATAATGTGTGGAATTGTGAGCGGATA<br>ACAATTTACACAGGAAACAGAATTAATTAAGCTTGTTGATACCCAAT<br>TCGAGAAAGGCCAATG                                                                                                                                                                                                                                                                                                                                                                                                                                                                   |
| <i>P<sub>NCgl1418-203</sub></i> | GACACCTGTGAGTTTCAAACCTCCCCATTATCGCCTTAGTCAGGCGGTA<br>GTGGGGAGTTTTTGTATTATGCAGGTGGCGCGATTCTTAGATTTTATAAG<br>GGTAACAGATCTGTTTCTATGTATTAAAGATCACACCGAGTGGTGGAA<br>TTTCTCAAGTGATTTACCCACAATGGACTTTGTTGATACCCAATTCGA<br>GAAAGGCCAATG                                                                                                                                                                                                                                                                                                                                                           |

---

---

|                                 |                                                                                                                                                                                                                                                                                |
|---------------------------------|--------------------------------------------------------------------------------------------------------------------------------------------------------------------------------------------------------------------------------------------------------------------------------|
| <i>P<sub>NCgl1418-145</sub></i> | TTTGTTTATGCAGGTGGCGCGATTCTTAGATTTTCATAAGGGTAACAGA<br>TCTGTTTCTATGTATTAAAGATCACACCGAGTGGTGGGAATTCCTCAAG<br>TGATTTACCCACAATGGACTTTGTTGATACCCAATTCGAGAAAGGCCA<br>ATG                                                                                                              |
| <i>P<sub>NCgl1418-94</sub></i>  | GTTTCTATGTATTAAAGATCACACCGAGTGGTGGGAATTCCTCAAGTG<br>ATTTACCCACAATGGACTTTGTTGATACCCAATTCGAGAAAGGCCAAT<br>G                                                                                                                                                                      |
| <i>P<sub>NCgl1418-A10</sub></i> | TAAAACCTCGCGATGAAGTAGAAAAACAACGCAACACTTAAGACACCT<br>GTGAGTTTCAAACCTCCCCATTATCGCCTTAGTCAGGCGGTAGTGGGGA<br>GTTTTTGTATTATGCAGGTGGCGCGATTCTTAGATTTTCATAAGGGTAACA<br>GATCTGTTTCTATGTATTAAAGATCTAACTCTTGGGTGGGAATTCCTCA<br>AGTGATTTACCCACAATGGACTTTGTTGATACCCAATTCGAGAAAGGC<br>CAATG |

---

<sup>a</sup>Direct repeat and spacer sequences of crRNAs are indicated as capital and lowercase letters, respectively.

## References

- Jakoby, M., Ngouoto-Nkili, C.E., and Burkovski, A. (1999). Construction and application of new *Corynebacterium glutamicum* vectors. *Biotechnol. Tech.* 13, 437–441. doi: 10.1023/A:1008968419217
- Kirchner, O., and Tauch, A. (2003). Tools for genetic engineering in the amino acid-producing bacterium *Corynebacterium glutamicum*. *J. Biotechnol.* 104, 287–299. doi: 10.1016/S0168-1656(03)00148-2
- Li, M., Chen, J., Wang, Y., Liu, J., Huang, J., Chen, N., et al. (2020). Efficient multiplex gene repression by CRISPR-dCpf1 in *Corynebacterium glutamicum*. *Front. Bioeng. Biotechnol.* 8, 357. doi: 10.3389/fbioe.2020.00357
- Liu, J., Wang, Y., Lu, Y., Zheng, P., Sun, J., and Ma, Y. (2017). Development of a CRISPR/Cas9 genome editing toolbox for *Corynebacterium glutamicum*. *Microb. Cell. Fact.* 16, 205. doi: 10.1186/s12934-017-0815-5
- Sun, D.H., Chen, J.Z., Wang, Y., Li, M.Y., Rao, D.M., Guo, Y.M., et al. (2019). Metabolic engineering of *Corynebacterium glutamicum* by synthetic small regulatory RNAs. *J. Ind. Microbiol. Biotechnol.* 46, 203–208. doi: 10.1007/s10295-018-02128-4
